# Supplementary material
Source: Research Square preprint supplement (doi:10.21203/rs.3.rs-8832676/v1)
Supplement: Supplementary file 1 [file e304b5a4b0cc9128277e94e1.xlsx]

## Sheet: Sheet1
code	手术	sex	age in days	weightkg	Name of surgery	Use of pulmonary surfactant	CPB(min)	ACC(min)	ventilator time(h)	ICU time(d)	hospitalization(d)	ECMO	CRRT	PD	delayed sternal closure	death	Secondary thoracotomy	Postoperative CPAP	Initial postoperative PaO2	Initial postoperative FiO2	Preoperative intubation	preoperative CPAP	preoperative wbc	preoperative N%	preoperative RBC	preoperative PLT	Preoperative LV diastolic diameter (mm)	preoperative LV EF	preoperative HR(bmp)	preoperative BP(mmHg)	preoperative total protein(g/L)	Preoperative albumin(g/L)	Preoperative alanine aminotransferase(IU/L)	Preoperative aspartate aminotransferase(IU/L)	术前总胆红素umol/L	Preoperative total bilirubin(umol/L)	preoperative creatinine(umol/L)	Preoperative urea nitrogen(mmol/L)	postoperative CPAP	White blood cells 24 hours after surgery	Neutral% within 24 hours after surgery	Postoperative 24-hour red blood cell count	Postoperative 24-hour platelet count	Postoperative 24-hour LVEF	Postoperative 24-hour LV diameter(mm)	Postoperative total protein(g/L)	Postoperative albumin(g/L)	Postoperative alanine aminotransferase(IU/L)	Postoperative aspartate aminotransferase(IU/L)
1	TAPVC（心内）+PFO+三尖瓣成形	male	8	4.1	TAPVC+PFO+TVP	use	97	48	28	14	17	×	×	×	×	×	×	×	160.9	0.5	×	√	10.33	49.9	4.66	412	16	64	144	82 /61	53.5	33	12	30	34.21	14.86	28.4	1.9	×	15.33	82.5	3.94	390	70	14	62.8	62.8	44	89
2	coa端端吻合+主动脉弓成形+asd+pda	male	60	4.3	EAA+aortoplasy+asd+pda	use	139	72	24	5	17	×	×	×	×	×	×	×	100.5	0.5	×	×	6.93	20.4	3.29	367	17	63	126	90 /50	56.1	41.9	70	94	10.64	4.94	13.54	1.78	×	9.1	62.9	4.67	179	70	15	53	37.9	41	134
3	二尖瓣成形+VSD	female	89	5	MVP+VSD	no	184	120	30	7	34	×	×	√	×	×	×	×	76.5	0.5	√	√	9.16	89.1	3.37	479	22	60	130	117 /90	57.7	43.3	10	16	31.67	11.79	16.1	1.78	×	5.67	83.2	3.03	465	58	19	61.1	41.6	24	110
4	F4+ASD	male	60	5.3	TOF+ASD	use	111	85	51	9	24	×	×	×	×	×	×	√	75.9	0.4	×	×	7.61	11.5	4.85	283	15	77	158	88 /40	51.9	40.8	23	36	9.58	1.56	26.5	3.76	√	7.53	75.2	3.36	129	65	16	52.4	37.2	31	121
5	TAPVC（ 内）+三尖瓣成形	female	88	3.4	TAPVC+TVP	use	191	127	184	39	55	×	×	×	×	×	×	√	95.6	0.5	×	√	7.94	51.4	2.63	273	16	77	144	97/43	57.3	36.5	23	33	8.17	2.79	22.6	5.94	√	13.09	73.1	3.69	236	65	15	59.3	36.4	44	165
6	coa端端吻合+主动脉弓成形+ASD+PDA+VSD	female	27	3.1	EAA+aortoplasy+ASD+PDA+VSD	use	139	85	20	6	9	×	×	×	×	×	×	×	84.7	0.6	×	×	8.23	24.7	3.57	410	21	65	159	86/53	56.5	39.5	33	40	60.07	4.94	23.2	5.01	×	11.47	70	5.01	96	50	15	53.8	41.8	25	172
7	二尖瓣成形+主动脉弓成形+COA+PDA	male	21	2.2	MVP+aortoplasy+COA+PDA	no	147	88	72	20	26	×	×	√	×	×	×	√	59.4	0.6	×	×	5.84	32.3	4.14	354	10	75	157	62/32	46.4	29.9	9	18	162.81	6.72	38.7	1.18	√	14.58	79.5	4.1	174	70	12	53.1	38.9	26	100
8	coa端端吻合+主动脉弓成形+VSD+PF0	male	60	4.8	EAA+aortoplasy+VSD+PF0	no	125	98	24	4	9	×	×	×	×	×	×	×	82	0.7	×	×	6.21	25.7	3.31	315	27	74	138	80/40	55.2	40.3	19	28	24.95	6.18	29.6	2.21	×	8.36	65.9	3.42	182	60	19	53.6	37.7	31	47
9	VSD+ASD部分闭合	female	60	4.8	VSD+ASD	no	98	39	132	10	26	×	×	×	×	×	×	×	72.1	0.5	×	×	7.52	16.9	3.48	344	21	75	132	79/40	55.1	35.9	39	31	6.13	1.63	16.7	1.09	×	10.93	69.3	3.6	198	56	19	56.2	35.9	22	67
10	F4+ASD+PDA	female	80	5.3	TOF+ASD+PDA	no	198	148	261	23	36	×	×	√	×	×	×	√	106.7	0.5	×	×	8.4	18.9	5.12	453	13	66	136	59/35	56.8	38.8	24	36	2.07	0.31	16.3	4.2	√	10.98	67.9	5.48	106	70	13	48.5	31.9	7	134
11	二尖瓣成形+三尖瓣成形+VSD+F0	male	86	3.7	MVP+TVP+VSD+PFO	no	118	82	77	23	42	×	×	×	×	×	×	√	86.1	0.5	×	×	5.12	51.5	4.21	368	37	68	147	66/41	58.2	42.1	26	106	5.67	1.42	15	5.03	√	9.53	77.2	3.17	182	65	28	51.7	36.6	83	123
12	TAPVC（心内）+F0	male	84	5.1	TAPVC+PF0	no	127	86	18	6	15	×	×	×	×	×	×	×	83.3	0.7	×	×	6.72	25.4	4.84	242	15	84	129	72/43	52.5	37.9	31	37	7.51	1.27	16.6	4.12	×	9.5	69.8	4.99	127	70	19	57.4	42.9	31	305
13	coa端端吻合+主动脉弓成形+DORV心室内隧道+PDA	male	2	3.4	EAA+aortoplasy+DORV+PDA	no	172	112	213	37	39	×	×	√	√	×	×	√	96.4	0.5	×	×	12.91	68.8	4.12	288	12	70	122	75/39	46.6	30.7	3	36	106.46	5.8	48	3.05	√	11.28	76.9	4.14	105	68	13	47.7	32.7	76	128
14	TAA矫治+主肺动脉窗+肺动脉起源异常+PDA+PF0	male	12	3.4	TAA+APW+AORPA+PDA+PF0	no	173	135	119	29	31	×	×	√	√	×	√	√	89.4	0.5	×	×	15.84	73.6	3.9	210	19	68	155	65/44	47.8	32.7	8	22	69.29	8.05	66.6	2.68	√	9.54	70.9	3.94	102	55	18	54.3	39.9	26	62
15	TGA+ASD直缝+PDA	male	11	3.5	TGA+ASD+PDA	no	130	81	49	17	24	×	×	×	×	×	×	×	127	0.6	×	×	8.46	60	4.94	236	17	70	137	82/45	42.1	29.2	11	89	38.8	5.55	70.7	3.66	×	6.66	79.5	3.36	206	64	16	50.2	39.1	11	85
16	心室内隧道修补+主动脉窦成形+TGA+PF0	male	30	4.2	TGA+PF0	use	187	145	24	10	20	×	×	×	×	×	×	√	88.2	0.5	×	×	7.93	27.6	3.93	372	23	76	152	67/44	56.5	41.6	18	21	28.31	4.07	20.7	3.2	√	7.71	77.3	3.36	70	48	18	53	37.4	30	243
17	TGA+DORV+右室流出道疏通	female	83	4.3	TGA+DORV	no	166	135	240	21	35	×	×	×	×	×	×	√	80.8	0.5	×	×	9.15	24.6	4.97	260	27	79	153	65/40	58.2	39.7	47	66	11.66	2.64	15.4	2.23	√	7.89	73.8	4.14	84	41	24	56.1	37.2	48	298
18	coa端端吻合+主动脉弓成形+PDA+PF0+VSD	female	30	3.3	EAA+aortoplasy+PDA+PF0+VSD	no	189	122	24	4	21	×	×	×	×	×	×	×	97	0.5	×	×	13.13	32.9	3.23	728	22	76	147	57/37	57.1	40.1	30	51	13.48	2.55	15.2	1.49	×	19.14	74.7	6.14	166	40	20	43	30.7	25	98
19	TGA+PDA	male	6	3.2	TGA+PDA	no	258	106	175	21	28	×	×	√	√	×	×	√	92.1	0.6	×	×	14.75	67.5	4.16	392	16	64	161	68/42	46.8	30.7	4	24	105.07	5.78	45.9	1.5	√	13.31	70	3.82	295	60	15	47.5	34.9	80	153
20	IAA+VSD+ASD封堵+PDA+左室流出道疏通	male	7	2.7	IAA+VSD+ASD+PDA	use	171	100	50	12	17	×	×	×	×	×	×	√	92.8	0.6	×	×	7.42	49.6	4.04	184	16	69	141	89/67	53.5	32.8	17	34	162.45	6.81	60	1.71	√	10.37	80.7	2.96	139	65	18	53.6	41.6	10	68
21	ASD+PDA+VSD	male	21	4	ASD+PDA+VSD	no	153	109	35	10	16	×	×	×	×	×	×	×	84.6	0.5	×	√	10.76	56.3	3.82	335	22	74	145	92/60	55.1	37	7	27	254.78	0.71	29.3	1.82	×	10.76	56.3	3.82	335	55	22	51.2	39	17	118
22	TGA+IAA+PDA+ASD+DORV+心室内隧道矫治	female	19	3.4	TGA+IAA+PDA+ASD+DORV	use	300	222	141	30	35	×	×	√	√	×	×	√	73.1	0.6	×	×	22.89	75.6	4.93	311	17	69	145	88/43	47.4	31.4	7	26	39.28	6.35	67.4	3.62	√	12.81	75.6	4.44	224	42	21	48.9	37.5	24	307
23	TAPVC（心内+心上）	female	14	2.9	TAPVC	use	112	54	49	21	25	×	×	×	×	×	×	√	94.2	0.4	×	×	22.3	78.4	4.94	214	14	69	135	70/35	48	35.2	6	50	93.53	4.67	68.4	4.93	√	17.32	89.9	5.39	80	62	13	55.1	39.4	8	91
24	TGA+PDA	male	25	4.1	TGA+PDA	no	120	66	167	13	19	×	×	√	×	×	×	√	73.3	0.5	√	×	6.91	72.7	3.59	471	27	67	142	79/43	57.4	37.5	10	66	162.81	14.46	28.4	3.84	√	5.39	68.4	3.25	203	40	22	54.2	44.6	43	89
25	TGA+PDA+ASD	male	12	3.2	TGA+PDA+ASD	no	152	91	47	15	22	×	×	×	×	×	×	√	70.4	0.5	×	√	12.54	59.4	4.35	250	18	65	151	67/36	44.9	31.6	15	75	108.53	9.31	60.1	1.93	√	11.4	80.4	5.14	226	70	14	51.6	38.3	15	71
26	TGA+PDA	male	1	4.1	TGA+PDA	no	129	76	90	7	12	×	×	×	×	×	×	√	89.2	0.5	√	×	12.23	81.6	4.57	344	16	67	153	71/36	47.4	32.6	18	47	40.07	6.13	44.6	2.49	√	11.57	79.1	4.15	142	60	16	52.9	39.5	24	168
27	ASD+VSD	female	90	6	ASD+VSD	use	91	58	41	4	12	×	×	×	×	×	×	×	79.5	0.5	×	×	10.42	28.4	3.92	358	28	70	135	62/46	55.6	39.9	28	43	8.15	1.64	14.6	3.71	×	10.98	60	4.83	268	60	22	55.6	38.2	17	116
28	TGA+PDA+ASD	female	8	3.3	TGA+PDA+ASD	use	136	73	26	15	20	×	×	×	×	×	×	√	75.7	0.5	×	×	18.58	66	4.27	287	17	68	158	75/48	44	28.9	8	34	84.26	4.59	35	1.92	√	8.98	63.2	2.95	188	70	14	53.7	34.1	11	77
29	coa成形+弓成形+ASD+PDA+VSD	male	11	2.7	EAA+aortoplasy+ASD+PDA+VSD	use	250	157	108	19	24	×	×	√	×	×	×	√	92.1	0.6	√	×	9.06	67.5	3.47	223	18	38	167	51/35	51.1	32.8	15	33	169.4	9.73	25.83	2.74	√	11.65	80.6	4.67	41	68	15	41.4	30.3	45	247
30	弓中断+PF0+COA	male	21	3.7	IAA+PF0+COA	use	174	79	90	21	29	×	×	×	×	×	×	√	60.5	0.5	√	√	9.17	52.6	2.8	413	21	66	144	79/45	49.7	32.9	7	24	166.85	5.76	27.8	5.58	√	21.58	82.4	3.56	205	70	17	51.8	43.2	25	69
32	弓中断+VSD+PDA+COA+ASD	male	7	3.7	IAA+VSD+PDA+COA	use	142	85	27	13	20	×	×	×	×	×	×	√	87.9	0.6	×	×	6.39	46	3.22	291	15	68	120	62/35	37.8	25.9	8	33	166.79	14.48	30.6	1.58	√	8.15	75.3	3.38	151	65	15	43.3	34.6	10	73
33	二尖瓣成形+VSD+PDA+f0+主动脉瓣下隔膜切除	female	88	4.6	MVP+VSD+PDA+pfo+avp	use	153	109	48	14	27	×	×	×	×	×	×	√	83.2	0.5	×	×	7.34	18.4	4.23	194	29	58	114	67/36	51.6	40.5	26	77	5.41	2.76	17.7	1.8	√	7.08	64.6	5.19	105	58	18	56	37.6	13	165
34	TAPVC（心内+梗阻）+PDA	male	30	4.5	TAPVC+PDA	no	101	73	45	9	13	×	×	×	×	×	×	√	102.1	0.5	×	√	6.33	31.6	3.92	432	15	64	169	72/40	50.2	34.3	23	26	102.18	5.13	26.3	3.95	√	6.65	75.3	3.85	144	65	15	51.4	36.5	26	145
35	弓中断+VSD+F0+PDA	female	7	3.3	IAA+VSD+F0+PDA	use	151	91	46	19	24	×	×	×	×	×	×	√	65.2	0.5	×	×	6.94	65.2	4.38	225	15	68	150	69/48	48.9	30.7	7	22	156.19	10.66	56.3	5.34	√	7.8	67.3	4.83	158	73	14	54.2	39.5	24	37
36	TGA+PDA+DORV++PF0	male	20	3	TGA+PDA+DORV++PF0	no	196	134	190	38	44	×	×	×	×	×	×	√	112.6	0.6	×	×	9.05	52.5	3.59	331	19	55	161	107/68	45.2	27.5	5	65	103.86	5.53	57.2	1.98	√	13.05	73.6	5.32	161	35	15	48.3	35.6	101	262
38	coa端端吻合+主动脉弓成形+ASD+VSD	female	38	5.9	EAA+aortoplasy+ASD+VSD	no	123	82	45	12	19	×	×	×	×	×	×	√	115	0.5	×	×	10.2	25.8	3.89	323	28	77	146	70/42	55.8	38.4	48	61	43.26	6.67	25.7	2.52	√	8.05	63.9	3.61	165	53	17	57.3	42.7	74	128
39	TGA+PDA+VSD	female	4	2.7	TGA+PDA+VSD	use	231	179	93	17	26	×	×	√	×	×	×	√	107.4	0.6	×	×	9.35	64.1	4.83	233	15	70	142	53 /31	41.3	27.2	8	26	176.17	11.15	54.6	1.87	√	13.11	81.9	4.36	161	65	13	46.3	33.8	23	77
40	三尖瓣成形+VSD+ASD+PDA	female	30	3.9	TVP+VSD+ASD+PDA	use	97	56	59	28	62	×	×	×	×	×	×	√	139.6	0.5	×	×	15.35	42.6	4.71	309	23	65	139	83/48	54.1	38.7	46	98	10.89	2.05	22.1	5.09	√	15.96	82.3	4.54	156	35	20	49.4	28.4	50	112
41	TGA+PDA+PF0+VSD	male	6	3.9	TGA+PDA+PF0+VSD	no	154	84	138	18	24	×	×	×	√	×	×	√	103.9	0.5	×	×	28.21	83.3	3.88	312	19	65	157	78/43	58.6	41.8	5	50	66.92	3.64	76.49	4.48	√	21.92	87.5	3.98	306	62	16	53	38.2	10	117
43	coa端端吻合+主动脉弓成形+PFO+VSD+PDA	female	12	3.1	TAPVC+ASD+PDA+PFO	no	150	103	42	17	22	×	×	√	×	×	×	√	102.4	0.5	×	×	10.38	34.3	3.43	370	15	65	160	77/65	46.5	30.9	11	14	162.39	10.91	34.12	0.88	√	13.32	86.7	4.16	143	60	12	50	37.6	31	126
44	三尖瓣成形+肺动脉起源异常+VSD+PFO	female	60	4.4	TVP+AORPA+VSD+PFO	no	162	109	181	28	43	×	×	×	×	×	×	√	119.7	0.5	×	×	12.69	39.1	4.89	180	22	74	126	85/45	53.6	34.1	15	58	20.18	3.37	22.96	4.57	√	16.84	78.5	5.15	116	60	17	48.6	31.7	22	173
45	TAPVC+ASD+三尖瓣成形	male	89	4.5	TAPVC+ASD+TVP	no	92	51	25	16	24	×	×	×	×	×	×	√	94.9	0.5	×	√	7.7	53.9	4.2	317	11	65	159	68/44	53.4	33.2	15	33	24.37	5.79	22.57	5.62	√	6.35	74.1	3.9	33	70	18	54.2	38.1	20	161
46	coa端端吻合+主动脉弓成形+PAPVC+ASD+PDA	female	7	2.9	EAA+aortoplasy+PAPVC+ASD+PDA	no	151	96	460	28	38	×	×	√	×	×	×	√	93	0.5	×	×	18.88	81	4.59	290	11	70	133	56/37	41.4	26.7	19	53	68.41	2.73	71.07	5.07	√	18.46	81.9	4.64	276	65	12	49.8	35.5	31	68
47	coa端端吻合+主动脉弓成形+PFO+PDA	male	10	2.9	EAA+aortoplasy+PFO+PDA	no	113	54	22	10	13	×	×	√	×	×	×	√	108.9	0.5	×	×	18.06	70.5	4.56	260	15	65	127	82/58	43.6	28	7	49	50.74	4.28	72.29	2.73	√	10.03	82.8	4.13	140	60	9	50.7	37.2	11	61
48	coa端端吻合+主动脉弓成形+VSD+ASD+PDA	male	20	1.5	EAA+aortoplasy+VSD+ASD+PDA	no	314	94	251	26	46	×	√	×	√	×	√	×	101.1	0.5	√	√	3.82	56.5	2.93	297	14	70	174	89/58	49	33.9	46	112	59.24	12.76	32.71	5.19	×	20.56	90.6	5.11	318	60	13	51.2	35.3	95	239
49	coa端端吻合+主动脉弓成形+VSD+ASD+PDA	male	29	2.7	EAA+aortoplasy+VSD+ASD+PDA	no	167	85	278	28	30	×	×	√	×	×	×	√	67.3	0.5	√	×	12.18	83.3	3.32	161	17	65	170	72/53	46	34.1	15	47	283.63	1.33	97.11	9.39	√	7.64	80.7	3.23	230	60	17	57.4	39.7	89	232
50	TOF	male	24	3	TOF	use	163	121	117	9	16	×	×	×	×	×	×	√	90	0.6	×	×	6.67	47.9	3.31	277	15	70	158	88/51	45.4	31.6	9	18	78.48	9.65	29.13	1.59	√	10.77	67.7	5.01	74	65	13	51.4	41	35	61
51	TGA+PDA+ASD+VSD+PFO	male	7	3.5	TGA+PDA+ASD+VSD+PFO	no	210	119	70	19	26	×	×	×	×	×	×	√	60.3	0.6	×	×	11.79	48.7	4.28	242	18	70	143	96/74	43.1	29.1	12	40	179.42	4.75	47.91	1.6	√	11.93	73.6	3.67	216	46	16	52.5	39.7	32	248
53	IAA+VSD+PFO+PDA+三尖瓣成形	male	12	3.7	IAA+VSD+PFO+PDA+TVP	no	159	86	270	28	39	×	×	√	√	×	×	√	54.1	0.8	√	×	25.03	72	4.19	131	12	65	107	78/45	49.7	27.8	35	59	192.14	8.28	130.43	3.74	√	9.98	83.9	4.43	119	65	13	49.5	30.1	124	258
54	主肺动脉窗+ASD	female	30	4	APW+ASD	no	119	55	48	5	20	×	×	×	×	×	×	×	87.5	0.5	×	×	7.15	22.5	3.66	322	25	68	139	69/44	53.6	37.8	28	41	26.7	10.66	18.58	2.87	×	11.37	80.4	4.85	173	46	21	57.3	42.5	29	116
55	IAA+主动脉弓成形+VSD+PDA+PFO	male	13	3.4	IAA+aortoplasy+VSD+PDA+PFO	no	153	116	54	11	31	×	×	×	×	×	×	√	76.9	0.7	×	×	11.82	55.8	3.36	331	19	50	156	102/57	51.4	32.4	6	17	127.34	3.69	43.13	2.9	√	9.89	58	2.92	379	40	14	51.7	35.5	53	74
56	IAA+左颈总-锁骨下+VSD+PDA+PFO	female	7	3.2	IAA+VSD+PDA+PFO	use	194	121	170	13	14	×	×	×	√	×	×	√	69.7	0.6	×	×	10.62	35.1	4.21	164	14	60	125	65/42	54.8	35.1	7	25	209.1	5.17	45.09	0.51	√	15.81	78.7	4.45	50	42	14	43.9	27.7	16	70
57	TAPVC（心上梗阻）+ASD+PDA	male	4	3	TAPVC+ASD+PDA	use	193	133	47	12	14	×	×	×	×	×	×	√	123	0.6	×	√	12.44	73.3	4.07	313	12	67	144	79/43	53.5	31.5	11	29	148.23	6.15	59.32	2.65	√	16.73	81.8	4.9	152	65	11	52.1	41.3	15	70
58	coa端端吻合+主动脉弓成形+ASD	male	16	4	EAA+aortoplasy+ASD	no	145	76	10	11	13	×	×	×	×	×	×	√	67.8	0.5	×	×	9.35	33.4	4.22	278	19	68	170	72/40	48.5	32.2	23	55	47.86	4.62	23.86	0.33	√	15.08	81.8	3.33	172	60	17	52.3	3.9	16	70
59	TAPVC（ 内）+PFO+PDA	male	5	3.9	TAPVC+PFO+PDA	use	94	42	78	8	14	×	×	×	×	×	×	√	70.4	0.5	√	×	8.72	70.9	4.61	291	17	65	160	70/46	40.7	25.9	20	79	130.42	4.67	70.15	4.39	√	8.6	76.7	3.75	248	62	14	62.1	47.7	16	58
60	coa端端吻合+主动脉弓成形+VSD+ASD+PDA	male	13	4	EAA+aortoplasy+VSD+ASD+PDA	no	126	82	10	22	26	×	×	×	×	×	×	√	69.4	0.5	×	√	11.12	45.5	4.23	344	18	61	142	73/40	50.3	31.9	11	20	85.71	4.14	30.06	1.9	√	23.12	78.7	3.85	252	60	17	62.8	38.3	20	72
61	COA+PDA	male	18	1.8	COA+PDA	use	126	65	107	9	14	×	×	×	×	×	×	×	67.5	0.6	√	×	22.85	50	2.83	80	12	50	181	37/19	32.1	23	35	93	192.74	27.86	62.94	11.26	×	12.28	75.2	3.42	392	65	12	46.1	33.3	33	182
62	VSD+ASD	male	25	3.1	VSD+ASD	no	101	65	25	6	8	×	×	×	×	×	×	√	51.9	0.5	×	×	11.7	19.8	3.76	464	23	71	172	73/46	55.2	43.2	12	32	215.21	26.57	22.98	6.52	√	8.24	65.4	4.96	122	43	16	54	41.1	17	177
63	coa端端吻合+主动脉弓成形+肺动脉环缩+PDA	female	30	2.4	EAA+aortoplasy+banding+PDA	no	105	50	24	22	30	×	×	√	×	×	×	√	51.1	0.6	×	×	3.95	22.5	3.25	358	20	78	163	80/63	49	38.5	10	20	124.78	5.23	14.2	4.31	√	13.28	67.3	3.81	145	68	17	47	39.4	241	141
64	VSD+ASD	female	30	4.2	VSD+ASD	use	119	54	21	8	29	×	×	×	×	×	×	√	112.2	0.5	×	×	7.62	19.3	4.17	291	27	61	154	67/44	53.6	40.7	18	30	24.47	4.27	18.48	5.35	√	9.94	81.6	3.18	119	43	23	49	24.3	168	249
65	TGA+PDA+ASD+VSD+F	male	30	4.7	TGA+PDA+ASD+VSD+F	no	112	56	25	7	11	×	×	×	×	×	×	×	98.5	0.5	×	×	5.8	31.6	2.85	367	29	45	125	93/67	68.3	53.1	39.9	23	184	7.6	21.3	3.5	×	12.28	75.2	3.4	392	65	12	56	40	18	131
66	coa端端吻合+主动脉弓成形+PFO+PDA	female	28	3.5	EAA+aortoplasy+PFO+PDA	use	135	83	27	16	22	×	×	×	×	×	×	√	70	0.5	×	×	5.92	36.8	4.8	275	18	75	127	63/37	47	32.3	55	229	159.29	7.62	39.12	1.67	√	8.48	76.6	4.11	158	65	15	50.4	33.7	12	50
67	TAPVC（上）	male	30	3.6	TAPVC	use	114	74	155	43	61	×	×	×	×	×	×	√	76	0.6	×	√	9.49	59.7	3.45	238	13	73	180	71/43	45.9	31.6	28	37	15.71	8.56	12.53	2.9	√	10.04	57.7	4.71	152	62	13	55.3	43.5	83	17
68	TGA+PDA+ASD+VSD	male	12	3.1	TGA+PDA+ASD+VSD	no	167	102	48	19	26	×	×	×	×	×	×	√	77.6	0.5	×	√	20.8	72.6	4.41	342	14	64	168	80/52	46.8	31.4	55	92	94.79	6.22	57.4	4.13	√	11.59	78.8	4.08	355	58	16	58.4	42.3	20	186
69	coa端端吻合+主动脉弓成形+VSD+ASD+PDA	male	18	3.9	EAA+aortoplasy+VSD+ASD+PDA	no	157	100	178	34	35	×	×	√	√	×	×	√	75.5	0.6	√	×	22	77.7	2.96	131	18	54	197	88/61	49.3	31.3	56	94	212.39	9.18	83.06	8.14	√	21.72	81.4	4	58	70	18	33.6	27	77	284
70	三尖瓣成形+VSD+ASD+PDA	female	30	4.7	TVP+VSD+ASD+PDA	use	104	76	49	14	23	×	×	×	×	×	×	×	66.7	0.6	×	×	2.85	22.7	3.42	205	24	40	123	62/43	52.7	38.9	14	27	55.79	8.77	28.75	4.91	×	8.19	77.6	3.8	218	36	27	56.1	38.5	20	110
71	coa端端吻合+主动脉弓成形+VSD+ASD+PDA	male	3	2.9	EAA+aortoplasy+VSD+ASD+PDA	use	159	69	161	16	21	×	×	√	√	×	√	√	99.3	0.6	×	×	9.76	69.6	4.49	255	14	66	145	68/39	46.2	28.4	13	55	138.54	8.15	57.22	1.61	√	13.36	83.4	4.15	151	70	12	41	35.7	46	60
72	TGA+coa端端吻合+主动脉弓成形+VSD+ASD+PDA	female	14	4.1	TGA+EAA+aortoplasy+VSD+ASD+PDA	use	226	149	43	12	25	×	×	×	×	×	×	√	62.2	0.6	×	×	10.03	21.5	4.48	359	20	77	158	69/51	54	35.9	20	32	159.09	6.05	34.23	3.45	√	11.08	77.9	4	175	38	16	57.3	38.6	89	143
73	coa端端吻合+主动脉弓成形+ASD+VSD+PDA	female	14	3	EAA+aortoplasy+ASD+VSD+PDA	no	93	47	68	27	30	×	×	×	×	×	×	√	61.6	0.5	√	×	6.89	40.2	3.53	234	18	70	158	99/52	51.4	32.1	10	21	126.07	3.53	27.18	0.96	√	17.9	80.3	3.29	231	65	17	50.2	34.7	71	69
74	TGA+VSD+ASD+PDA	male	19	3.3	TGA+VSD+ASD+PDA	use	158	122	25	12	19	×	×	×	×	×	×	√	66.3	0.7	×	√	6.97	59.4	4.37	277	17	68	156	67/49	51.9	35.5	9	33	236.15	11.3	72.04	3.2	√	13.73	85.4	3.77	182	60	16	50.5	36	12	59
75	coa端端吻合+主动脉弓成形+ASD+VSD+PDA+气管成形	male	14	4.2	EAA+aortoplasy+ASD+VSD+PDA+slide	use	219	104	154	20	31	×	×	√	√	×	×	√	92.1	0.5	√	×	15.48	73.9	3.75	404	20	70	166	62/33	50.3	33.1	45	32	29.17	14.31	41.75	3.61	√	5.81	73.9	4.63	106	60	19	52.1	35.8	35	106
76	VSD+PDA+冠状动脉瘘修补+肺动脉环缩+FO	male	13	3.2	VSD+PDA+CAF+bading+pfo	no	143	84	198	19	34	×	×	√	√	×	√	×	85.9	0.5	×	√	14.96	59.5	4.42	172	14	80	142	66/46	38.9	28	9	26	194.77	8.05	62.81	2.02	×	17.56	80.6	4.37	15	60	18	36.3	28.6	74	409
77	coa端端吻合+主动脉弓成形+肺动脉起源异常+PDA+ASD部分闭合	female	8	2.9	EAA+aortoplasy+AORPA+PDA+ASD	no	123	85	43	15	31	×	×	×	×	×	×	√	69.7	0.5	×	×	12.15	31.9	3.96	414	16	78	160	71/52	50.2	34.8	13	27	117.37	5.01	31.93	1.17	√	6.12	61	3.86	193	60	14	50.5	37.1	25	133
78	coa端端吻合+主动脉弓成形+VSD+ASD+PDA	male	11	2.7	EAA+aortoplasy+VSD+ASD+PDA	use	123	53	26	12	15	×	×	×	×	×	×	×	68.5	0.5	×	×	6.67	40.9	4.02	134	18	68	141	88/62	48.3	32.4	10	22	195.93	41.88	41.88	3.62	×	11.82	80.6	3.85	186	70	15	54.5	42.1	9	36
79	TAPVC（上）+VSD+ASD+PDA+FO	male	10	3.1	TAPVC+VSD+ASD+PDA+FO	no	194	134	49	19	24	×	×	×	×	×	×	√	90.6	0.55	×	×	5.57	67.3	4.32	172	16	73	145	78/54	51.2	35.1	17	44	269.45	6.41	44.26	1.04	√	19.82	74.2	4.05	97	70	12	44.8	37.5	25	147
80	弓中断+VSD+ASD	male	5	3.9	IAA+VSD+ASD	no	134	88	44	18	20	×	×	×	×	×	×	×	71.3	0.5	×	×	17.02	77.8	4.74	265	21	70	160	77/47	52.1	33.5	9	27	51.81	4.99	59.3	2.89	×	15.14	76.1	3.89	112	70	14	49.8	40.6	42	158
81	肺静脉成形+VSD+ASD+房缺开窗	female	86	4.8	PVS+VSD+ASD	no	187	135	190	26	29	×	×	×	√	×	×	√	72.8	0.6	√	×	7.23	34.2	4.19	319	14	65	160	79/56	58.8	40.1	14	35	3.36	0.87	16.22	6.09	√	5.32	67.3	3.4	93	65	15	46	32.9	101	256
82	心室内隧道修补+右室流出道疏通+PFO	male	90	4.5	DORV+PFO	no	142	105	16	14	29	×	×	×	×	×	×	√	66.7	0.5	×	×	6.87	41.6	3.34	260	22	57	154	66/34	54.8	40.5	30	38	8.38	1.11	17.1	3.79	√	10.94	77.6	3.14	167	58	25	51.7	33.7	69	231
83	coa端端吻合+主动脉弓成形+ASD+PDA+三三尖瓣成形	male	6	3	EAA+aortoplasy+ASD+PDA+TVP	use	110	65	45	22	34	×	×	×	×	×	×	√	79.6	0.6	×	×	10.1	53.7	3.55	262	15	74	150	63/48	48.5	31.3	27	50	142.58	4.04	72	3.73	√	13.2	78.4	4	125	65	13	53.4	38.6	66	59
84	coa端端吻合+主动脉弓成形+VSD+PDA+三三尖瓣成形	male	3	3.3	EAA+aortoplasy+VSD+PDA+TVP	use	161	111	88	15	22	×	×	×	×	×	×	√	54	0.6	×	×	10.41	51.3	4.27	324	20	59	158	68/46	44.3	29.8	55	128	89.25	6.63	37.56	1.56	√	10.83	89.4	4.48	103	60	15	52.7	40.6	24	64
85	TGA+VSD	male	30	4.2	TGA+VSD	use	188	128	206	28	44	×	×	√	×	×	×	√	54.8	0.5	×	×	8.76	21.8	4.16	387	17	69	140	96/48	48.7	40.7	19	49	50.05	10.56	18.03	1.62	√	8.77	66.9	4.46	125	36	21	52.9	39.2	49	90
86	ASD+VSD+右室流出道疏通	female	49	3.6	ASD+VSD+DORV	no	116	50	160	12	19	×	×	×	×	×	×	√	73.5	0.5	√	×	6.89	51	2.9	413	24	65	178	71/41	53	41.4	9	20	98.31	8.65	20.8	2.69	√	10.1	72.5	4.43	199	33	22	57.9	42.7	51	78
87	VSD+ PFO	male	17	4.4	VSD+ PFO	use	112	53	27	7	9	×	×	×	×	×	×	√	59.7	0.6	×	×	13.18	31.4	3.65	474	21	72	157	109/57	55.8	38.6	33	51	164.84	15.07	22.64	2.62	√	13.64	72	3.86	213	62	15	67.9	50.2	57	77
88	TAPVC（下）+PDA+PFO	male	1	3.1	TAPVC+PDA+PFO	use	123	73	163	19	26	×	×	√	√	×	×	√	62.3	0.7	×	×	13.49	77.7	4.98	197	11	60	147	63/32	54.5	35.1	7	57	63.9	7.16	59.88	3.84	√	6.7	81.9	3.54	49	65	15	55.5	39.9	18	85
89	coa端端吻合+主动脉弓成形+VSD+ PFO+PDA	female	14	3.2	EAA+aortoplasy+VSD+ PFO+PDA	no	160	90	106	8	12	×	×	×	×	×	×	√	50.6	0.7	√	×	6.49	21.5	4.67	327	23	45	160	66/42	45.1	32.1	69	53	244.86	9.45	35.57	3.86	√	10.77	81.8	3.55	79	35	17	52.7	40.9	28	83
90	弓中断+弓成形+coa+PFO	female	21	3.3	IAA+EAA+aortoplasy+PFO	no	131	72	185	27	31	×	×	×	×	×	×	√	86.8	0.5	×	×	9.09	32.5	3.42	471	25	54	165	73/57	53.4	37.5	22	37	23.9	4.2	21.36	1.94	√	10.32	72.3	3.97	204	60	17	58.3	35.4	53	122
91	coa端端吻合+主动脉弓成形+VSD+ PFO	male	28	3.9	EAA+aortoplasy+VSD+ PFO	use	106	77	45	10	14	×	×	×	×	×	×	√	41.4	0.65	×	×	10.97	43.7	3.88	350	24	67	165	107/65	53.3	37.7	19	42	126.33	5.08	21.52	2.86	√	11.24	76.3	3.82	207	70	18	57.5	41.8	28	92
92	TGA+PDA+ PFO	male	1	3.4	TGA+PDA+ PFO	no	115	83	71	15	20	×	×	√	×	×	×	√	68.5	0.7	×	√	27.59	82.1	4.09	287	16	71	155	58/33	50.2	31.7	8	58	57.14	4.15	56.76	2.89	√	27.28	85.1	4.57	49	65	15	55	37.2	23	78
93	TAPVC（心上 ）+PFO	male	62	4.9	TAPVC+PFO	no	116	87	18	21	30	×	×	×	×	×	×	√	56.8	0.5	×	×	6.94	23.2	3.52	376	13	75	160	92/68	48.8	36.5	19	27	16.2	7.2	28.54	2.47	×	12.72	72.9	4.22	161	65	16	54	37.3	78	156
94	TGA+ASD	male	5	2.6	TGA+ASD	no	179	104	141	20	26	×	×	×	√	×	×	√	80.5	0.6	×	×	8.39	72.9	4.06	226	16	68	128	56/30	48.2	31	5	26	222.69	9.15	47.06	1.35	√	10.92	79.3	4.16	137	66	16	48	36.5	38	176
95	TGA+PDA++VSD+ PFO	male	44	4.2	TGA+PDA++VSD+ PFO	no	151	88	49	8	13	×	×	×	×	×	×	√	34.5	0.5	×	√	5.96	28.4	5.99	359	26	66	160	86/61	46.3	30	16	34	39.94	2.74	26.97	4.57	√	8.89	66.7	4.17	154	39	19	60.1	39.3	31	98
96	VSD+ PFO+PDA	female	73	4.6	VSD+ PFO+PDA	use	141	112	48	7	14	×	×	×	×	×	×	√	81.8	0.5	×	×	11.51	22.3	3.16	348	52	28	137	66/39	58.1	40.7	43	45	105.7	2.25	23.42	3.58	√	11.39	69.2	4.43	222	31	24	64.8	47.1	28	89
97	主肺动脉窗+弓中断+肺动脉起源异常+ PDA+ASD	male	14	4.3	APW+IAA+AORPA+ PDA+ASD	no	122	98	62	25	29	×	×	×	×	×	×	√	52.1	0.7	√	√	19.22	74.4	4.63	182	19	78	142	64/31	47.7	30	33	47	183.19	6.66	87.75	6.25	√	9.29	71.8	4.2	244	63	18	58	36.3	63	66
98	弓中断+VSD+ASD+PDA	male	7	2.8	IAA+VSD+ASD+PDA	use	177	134	51	17	22	×	×	×	×	×	×	√	80	0.6	×	×	8.19	29	3.98	219	14	70	152	84/44	46.7	30.6	5	22	194.63	6.42	46.38	0.84	√	10.9	77.5	4.14	111	60	16	55.8	41.7	7	75
99	coa端端吻合+主动脉弓成形+ASD+PDA+VSD	male	8	3.5	EAA+aortoplasy+ASD+PDA+VSD	no	168	95	145	26	33	×	×	×	√	×	×	√	71.9	0.5	×	×	10.64	45.3	3.12	338	15	66	144	58/28	51.2	33.9	8	15	236.37	11.54	27.48	0.8	√	9.45	69.2	4.71	241	65	15	54.3	39.2	32	70
100	主动脉窦成形+弓成形+弓中断+升主动脉成形+VSD+ PFO+PDA	male	8	3.3	EAA+aortoplasy+IAA+VSD+ PFO+PDA	no	168	101	121	22	22	×	×	×	√	×	×	√	69.1	0.6	×	×	8.42	42.1	4.55	255	65	17	128	82/57	45.8	32	6	28	611.14	7.83	61.58	3.09	√	17.5	78.2	4.61	190	55	15	50.4	41.2	11	80
101	TAPVC（ 下 ）+垂直静脉结扎+三尖瓣成形	male	25	2.9	TAPVC++TVP	use	128	78	195	13	13	×	×	×	×	×	×	√	57.3	0.6	√	×	4.97	63.6	2.79	624	14	70	143	83/47	51.3	36.6	9	22	28.8	11.89	22.59	1.26	√	11.93	81.5	3.79	120	70	14	64.6	39.4	82	161
102	TGA+PDA++VSD+ PFO	male	15	4.1	TGA+PDA++VSD+ PFO	use	212	147	43	21	24	×	×	×	×	×	×	√	72.4	0.6	×	√	10.8	52.3	4.4	231	15	61	149	66/46	52.9	35.8	16	42	128.22	3.49	47.41	2.37	√	12.74	83.9	4.51	297	60	18	57.6	39.1	78	112
103	TAPVC（内 ）+PFO+PDA	male	14	3.1	TAPVC+PFO+PDA	use	118	53	27	18	23	×	×	×	×	×	×	√	76.5	0.5	×	√	5.99	39.5	4.68	219	16	59	125	96/57	44.8	34	9	33	302.7	12.91	34.78	0.72	√	9.07	65.7	4.73	143	65	14	53.9	43.6	38	69
104	弓成形+主动脉瓣下隔膜切除+COA+左室流出道疏通+PDA+PFO+VSD	female	15	4.5	EAA+aortoplasy+PDA+PFO+VSD	no	188	114	255	27	35	×	×	×	×	×	×	×	77.6	0.6	√	×	17.18	48.6	4.21	260	18	70	133	80/54	59.1	29.1	43	29	184.02	17.82	40.54	3.3	√	15.18	72.2	6.19	140	60	17	51	39.2	22	112
105	TGA+PDA+ASD+心室内隧道矫治	male	13	4.2	TGA+PDA+ASD	use	156	103	22	15	20	×	×	×	×	×	×	√	73.6	0.5	×	√	13.34	46.8	4.07	287	20	65	150	78/37	51.5	31.4	10	21	103.52	8.01	41.89	3.9	√	10.15	76.5	4.02	149	65	16	62.8	42.6	18	142
106	coa成形+弓成形+ASD+VSD	male	11	3.7	EAA+aortoplasy+ASD+VSD	no	153	70	25	18	26	×	×	×	×	×	×	√	87.7	0.7	×	×	10.01	45.3	3.06	495	18	68	142	79/40	52.4	32.4	6	26	362.79	14.78	38.49	0.85	√	17.17	78.4	4.1	314	60	15	58.7	45.5	16	97
107	TGA+PDA+ASD+VSD	female	3	3.1	TGA+PDA+ASD+VSD	no	146	73	76	17	23	×	×	×	×	×	×	√	55.4	0.6	√	×	13.38	45.9	4.52	306	16	66	145	56/38	49	32.8	13	21	116.08	5.83	48.19	2.6	√	12.83	74.1	5.06	320	60	12	53.2	34.1	45	44
108	coa端端吻合+主动脉弓成形+ASD+PDA	male	14	2	EAA+aortoplasy+ASD+PDA	use	106	52	53	22	22	×	×	×	×	×	×	√	70	0.55	×	√	4.82	27.6	4.16	143	16	49	125	70/59	41.8	26	12	17	137.39	8.55	35.23	1.49	√	8.65	82.6	3.52	272	64	12	53.6	40.5	13	45
109	ASD+VSD+PFO	male	60	6	ASD+VSD+PFO	use	108	72	72	6	14	×	×	×	×	×	×	√	77.4	0.5	×	×	7.29	5.2	3.53	158	31	64	126	61/38	51.6	35.9	31	42	21.51	2.65	24.38	2.43	√	6.78	68.2	4.06	210	30	23	56	44.7	75	224
110	TAPVC（内 ）+PDA+PFO	male	8	3	TAPVC +PDA+PFO	use	126	75	60	16	27	×	×	×	×	×	×	√	63.4	0.5	×	√	14.65	68.2	3.76	262	12	70	178	64/48	44	30.7	38	90	160.92	3.11	63.05	8.38	√	11.83	86	2.85	75	70	11	53.9	33.7	57	149
111	主动脉瓣成形+PDA+二尖瓣成形+PDA+主动脉瓣上狭窄	female	82	4.1	AVP+PDA+MVP+PDA	use	150	78	151	17	35	×	×	√	×	×	×	√	65.8	0.6	×	×	4.33	28.6	2.67	277	27	77	136	79/46	49.4	34.1	23	27	9.95	2.29	15.25	4.25	√	11.27	71.3	5.64	72	67	19	45.6	31.7	45	68
112	VSD+ASD	female	30	3.2	VSD+ASD	use	107	70	46	9	13	×	×	×	×	×	×	√	63.4	0.5	×	×	8.91	11.8	3.95	464	19	67	157	84/59	43.7	37.7	9	28	32.48	5.59	21.24	2.27	√	8.69	68.4	4.41	74	60	16	59.6	42.8	40	164
113	TAPVC（心内）+三尖瓣成形	female	27	4.1	TAPVC +TVP	use	116	43	27	7	12	×	×	×	×	×	×	√	63.1	0.5	×	×	8.61	25	5.16	336	12	61	145	72/45	50	35.9	11	26	198.73	23.26	25.47	4.62	√	8.07	66.6	3.91	135	65	15	61.2	36.8	17	121
114	TAPVC（上）+ASD+PDA	male	4	3.4	TAPVC +ASD+PDA	use	139	49	113	18	24	×	×	×	×	×	×	√	66.9	0.6	√	×	15.15	64.2	4.54	285	11	67	170	75/52	51.1	34.9	6	28	38.45	5.06	37.79	3.57	√	21.66	76.5	5.38	70	68	14	44	33	26	75
115	主动脉弓中断+心室内隧道+PDA+ASD	male	11	4.2	IAA+PDA+ASD	use	182	127	48	26	29	×	×	×	×	×	×	√	61.8	0.6	×	×	8.11	30	3.92	260	20	68	153	64/47	45.5	32.2	12	25	189.54	4.55	30.6	0.87	√	11.43	80.2	4.5	232	68	16	55.6	38.6	50	127
116	coa成形+弓成形+ASD+VSD	male	17	3.7	EAA+aortoplasy+ASD+VSD	use	183	131	44	13	17	×	×	×	×	×	×	√	80.7	0.6	×	√	7.83	27.1	3.35	469	21	65	140	54/39	52.6	34.5	38	74	102.98	8.88	17.76	1.66	√	13.51	78.4	4.74	332	48	16	54.9	38.2	42	135
117	弓中断+弓成形+体肺侧枝结扎+PFO	male	71	4.8	IAA+EAA+aortoplasy+PFO	no	130	65	165	24	35	×	×	×	×	×	×	√	67.5	0.7	×	×	6.11	58.8	3.28	353	21	72	143	65/39	56.9	39	29	53	5.19	1.63	24	4.92	√	11.46	79.5	3.53	306	63	19	53	36.6	25	48
118	TGA++VSD+ PFO	male	9	3.3	TGA++VSD+ PFO	no	195	138	93	13	29	×	×	×	√	×	×	√	79.1	0.7	×	×	8.3	45	3.48	264	18	65	166	69/48	46.2	38.4	12	40	232.77	6.92	31.1	1.41	√	11.42	82.3	3.79	101	45	16	51	36.9	44	156
119	coa成形+弓成形+VSD+PFO	male	22	4	EAA+aortoplasy+VSD+PFO	no	135	88	141	14	22	×	×	×	√	×	×	√	88.6	0.6	×	√	8.22	33.7	3.42	262	22	67	172	71/45	43.6	34.1	16	31	155.22	16.43	26.43	2.01	√	11.83	70.2	4.03	202	65	16	59.7	41.6	30	162
120	coa成形+弓成形+PDA+PFO	male	32	4.6	EAA+aortoplasy+PDA+PFO	use	96	50	22	10	13	×	×	×	×	×	×	√	61.4	0.5	×	×	7.74	39.3	3.41	273	23	61	158	85/78	48.8	36.5	17	45	121.67	7.5	19.4	2.27	√	7.59	75.1	4.17	144	38	16	49.7	34.8	23	111
121	二尖瓣成形+VSD+PFO	male	69	4	MVP+VSD+PFO	use	126	61	25	14	20	×	×	×	×	×	×	√	67.7	0.7	×	√	4.53	35	3.04	335	28	71	147	93/60	54.4	36.7	22	23	6.99	1.02	18.13	3.67	√	8.63	60.6	3.47	202	53	23	52.2	34.2	15	113
122	VSD+ PFO	female	50	4.6	VSD+ PFO	use	112	44	74	9	15	×	×	×	×	×	×	√	100.2	0.6	×	×	6.77	20	2.66	306	24	69	139	58/43	50.5	33.7	16	33	72	2.46	26.76	3.59	√	12.66	83.6	5.5	174	17	23	56.9	37.3	40	211
123	coa成形+弓成形+PDA+VSD	male	5	4.1	EAA+aortoplasy+PDA+VSD	use	157	117	116	13	27	×	×	×	×	×	×	√	85	0.7	×	×	13.02	77.5	2.88	194	18	75	148	62/35	47.7	31	6	17	22.9	9.82	32.09	1.95	√	7.8	79.3	3.65	200	70	16	52.6	33.3	39	56
124	心室内隧道+PDA+ASD	female	74	3.3	DORV+PDA+ASD	use	120	75	72	8	26	×	×	×	×	×	×	√	64.3	0.6	×	×	13.76	19.4	4.85	372	12	68	155	67/42	50	42.1	78	170	38.85	7.19	22.23	5.7	√	10.79	81.5	3.54	176	67	13	54.8	36.4	121	213
125	VSD+PFO	male	28	4.1	VSD+PFO	use	82	58	45	10	18	×	×	×	×	×	×	√	59.6	0.6	×	×	6.98	24.1	3.23	242	23	72	165	87/56	55.5	40.1	14	29	34.53	16.41	22.3	5.37	√	8.24	70.6	4.42	115	42	18	58.8	39.1	28	100
126	TAPVC（ 内）+PFO	female	58	4.7	TAPVC+PFO	use	65	37	49	5	14	×	×	×	×	×	×	×	53.8	0.6	×	×	9.45	35.7	4.22	442	13	69	132	68/47	57.1	37.4	12	32	16.17	3.43	25.89	3.31	×	9.14	82.1	4.42	173	60	15	54.4	36.1	39	211
127	TGA+PDA+ASD+VSD	male	17	2.6	TGA+PDA+ASD+VSD	use	208	136	45	10	13	×	×	×	√	×	×	√	70.4	0.6	×	×	8.6	35.2	3.82	463	16	70	163	82/48	52.9	37.6	9	17	267.5	30.76	33.45	1.07	√	10.24	78.6	4.11	111	45	16	45.6	32.2	161	654
128	弓成形+coa+PDA+ASD+VSD+三尖瓣成形	female	8	3.4	aortoplasy+coa+PDA+ASD+VSD+TVP	no	132	86	55	14	18	×	×	×	×	×	×	√	63.5	0.55	×	×	9.45	48.4	4.94	249	15	65	170	66/48	47.5	28.4	9	23	239.44	2.88	32.63	0.84	√	17.39	76.3	4.75	65	62	15	53	42.8	72	108
129	VSD+ PFO	female	38	4.5	VSD+ PFO	use	125	49	50	6	15	×	×	×	×	×	×	√	53.7	0.8	×	×	8.77	15.6	3.24	140	29	56	156	62/44	55.5	38.4	10	36	124.89	1.8	23.14	2.81	√	8.85	79.4	5.15	206	36	20	60.2	44.1	120	215
130	二尖瓣成形+VSD+PDA	male	75	5.8	MVP+VSD+PDA	use	106	71	40	5	10	×	×	×	×	×	×	√	59.1	0.5	×	×	8.6	17	3.56	329	35	64	143	56/38	54.5	36.8	33	61	34.69	6.92	19.13	1.44	√	7.42	80.7	4.22	153	58	24	53.1	41.1	18	104
131	三尖瓣成形+主动脉弓成形+COA+PDA+ASD+VSD	male	19	3.9	TVP+aortoplasy+COA+PDA+ASD+VSD	use	146	111	38	6	10	×	×	×	×	×	×	×	67.6	0.6	×	×	7.79	54.8	4.14	381	14	65	151	73/49	48.7	28.1	23	41	32.69	2.15	32.69	2.15	×	15.83	85	5.38	232	45	16	60.4	41.8	125	213
132	TGA+PDA+ASD+VSD+主动脉瓣下隔膜切除	male	12	3.7	TGA+PDA+ASD+VSD	use	161	108	49	6	9	×	×	×	×	×	×	×	67.1	0.5	×	×	15.78	44.6	4.66	296	21	69	167	71/62	45	26.9	9	15	149.01	4.24	34.79	3.16	×	7.04	75.9	4.19	242	55	17	57.4	45	4	107
[truncated: 39 more columns]
